# Supplementary material for: Solid-state synthesis of few-layer cobalt-doped MoS2 with CoMoS phase on nitrogen-doped graphene driven by microwave irradiation for hydrogen electrocatalysis
Source: Royal Society of Chemistry journal article supplement (doi:10.1039/d0ra05560c), 2020-01-01
Supplement: d0ra05560c1.pdf [file d0ra05560c1.pdf]

## Supplementary Information

### Solid-State Synthesis of few-layer Cobalt-doped MoS<sub>2</sub> with CoMoS phase on Nitrogen-doped Graphene Driven by Microwave Irradiation

Junpeng Fan,<sup>a</sup> Joakim Ekspong,<sup>a</sup> Anumol Ashok,<sup>b</sup> Sergey Koroidov,<sup>c</sup> and Eduardo Gracia-Espino<sup>\*a</sup>

<sup>a</sup> Department of Physics, Umeå University, Umeå 90187, Sweden

<sup>b</sup> Department of Materials and Environmental Chemistry, Stockholm University, Stockholm 106 91, Sweden.

<sup>c</sup> Department of Physics, Stockholm University, Stockholm 106 9, Sweden.

\* Corresponding author: Eduardo Gracia-Espino (Email: eduardo.gracia@umu.se)

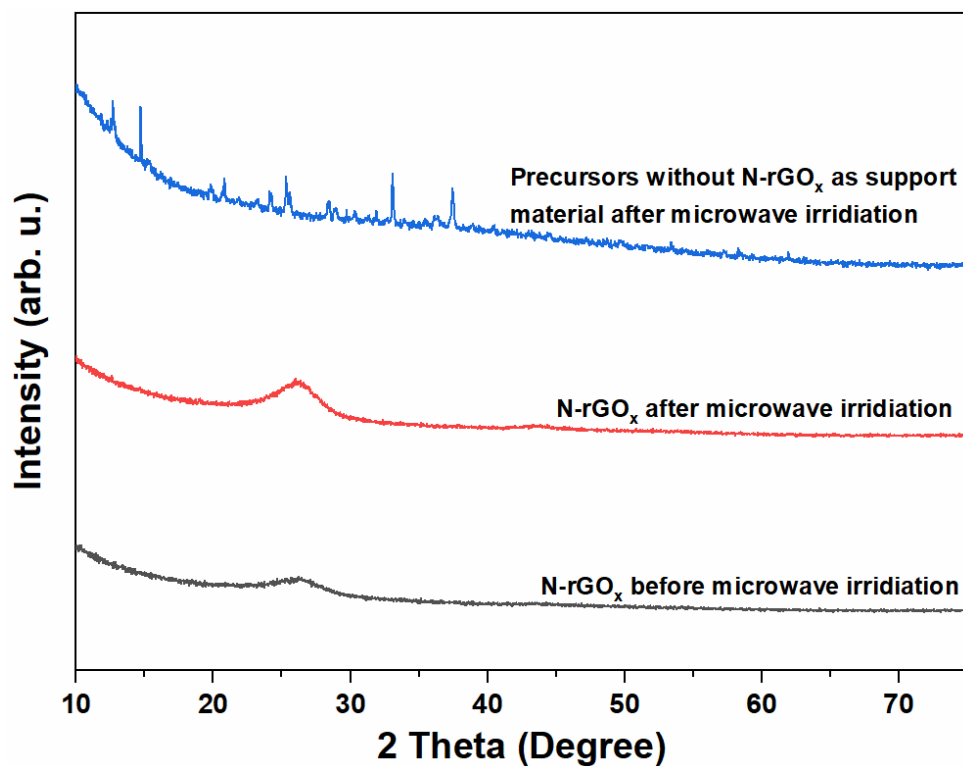

Fig. S1. XRD pattern of control samples.

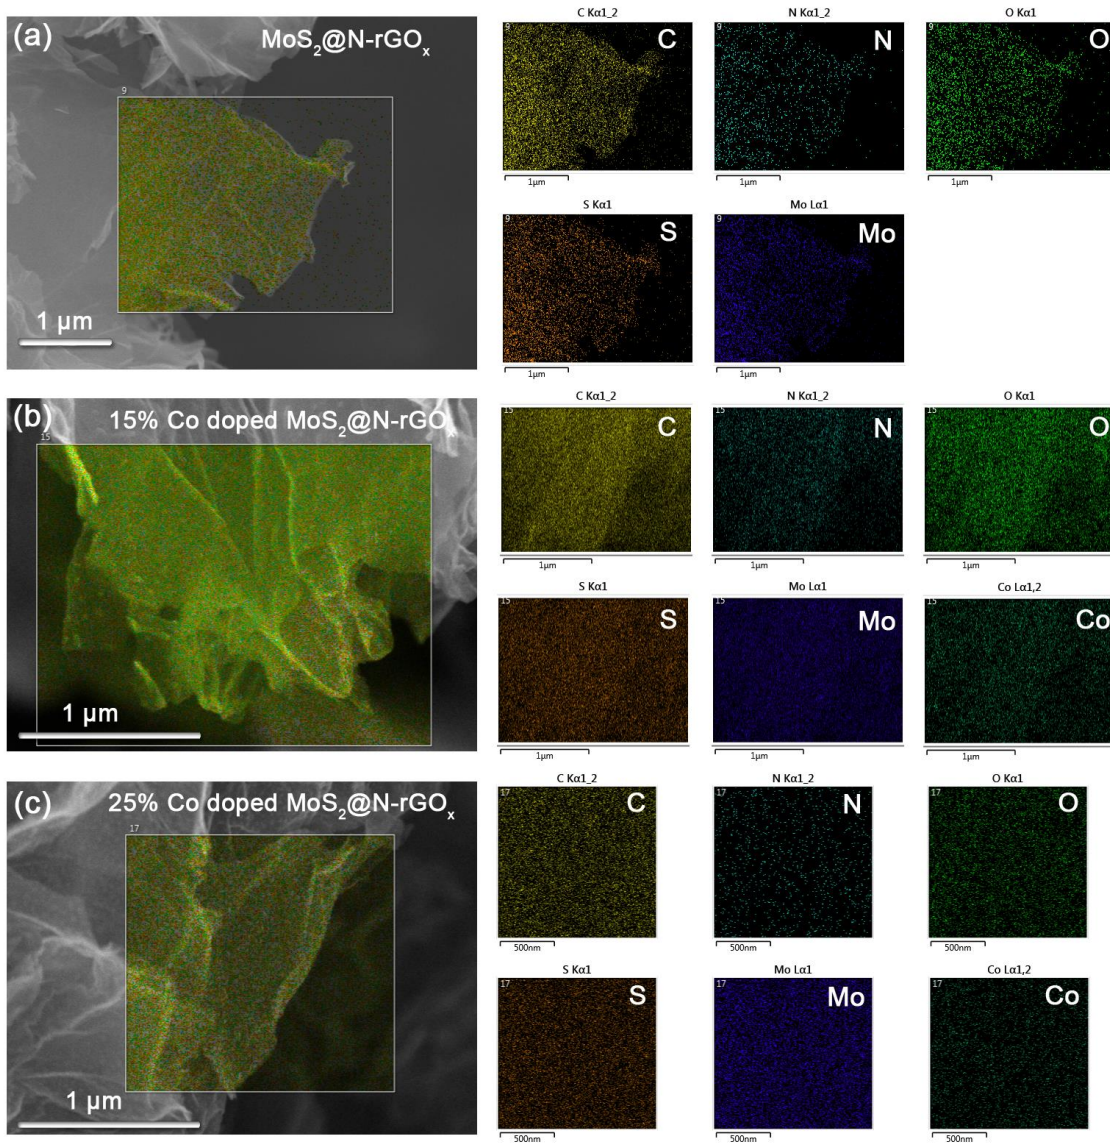

**Fig. S2.** SEM-EDS mapping and the corresponding element distribution of (a)  $\text{MoS}_2@N\text{-rGO}_x$ , (b) 15% Co- $\text{MoS}_2@N\text{-rGO}_x$  and (c) 25% Co- $\text{MoS}_2@N\text{-rGO}_x$

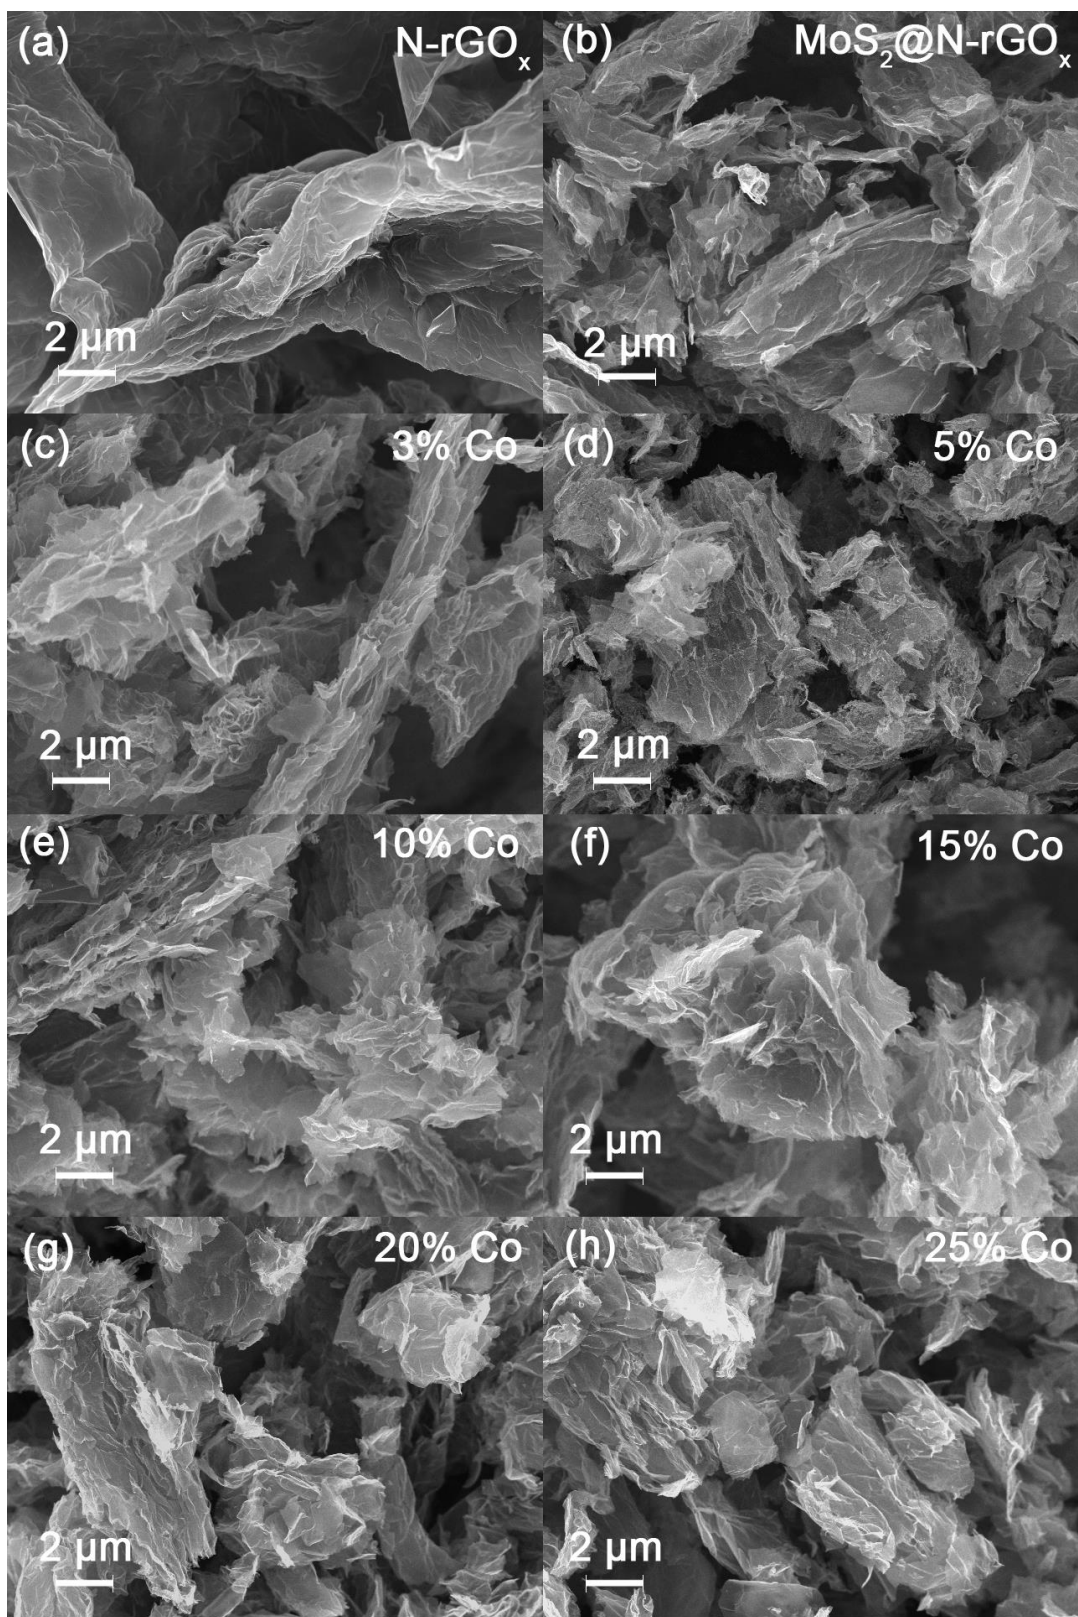

**Fig. S3.** (a)-(h) SEM images of N-rGO<sub>x</sub> and Co-MoS<sub>2</sub>@N-rGO<sub>x</sub>.

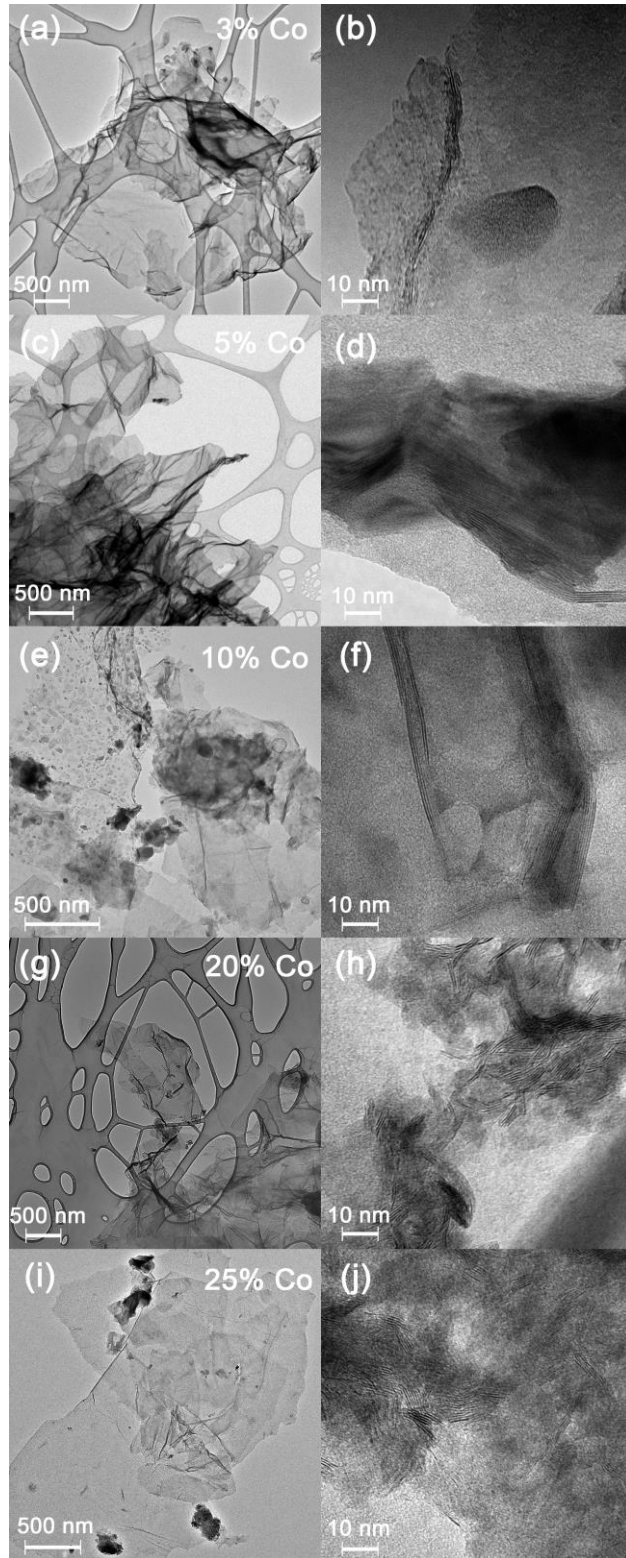

**Fig. S4.** TEM image of (a-b) 3%, (c-d) 5%, (e-f) 10%, (g-h) 20%, and (i-j) 25% Co-MoS<sub>2</sub>@N-rGO<sub>x</sub>.

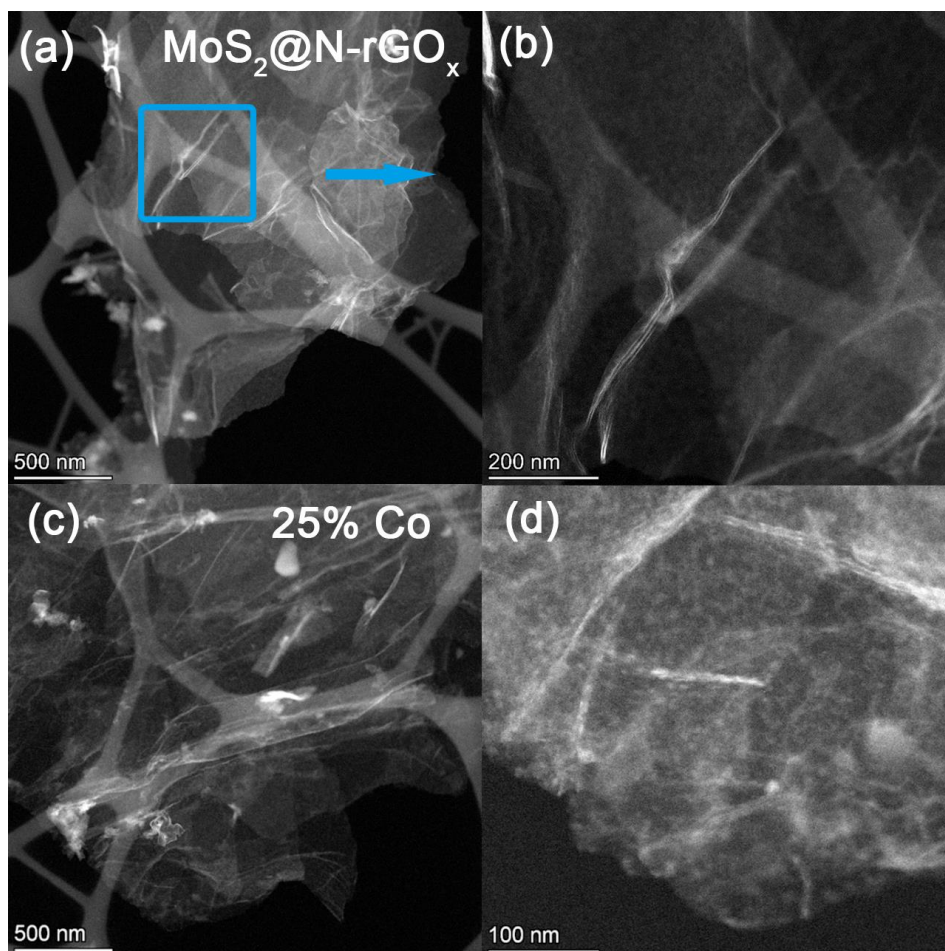

**Fig. S5.** STEM-HAADF images of (a-b)  $\text{MoS}_2@\text{N-rGO}_x$ , and (c-d) 25% Co- $\text{MoS}_2@\text{N-rGO}_x$ .

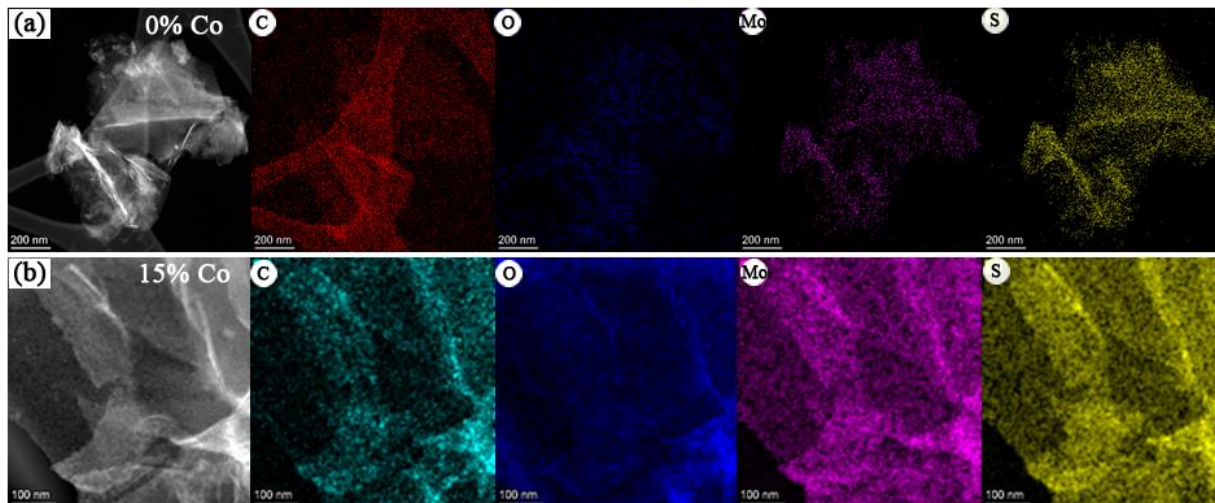

**Fig. S6.** Elemental mapping of (a) MoS<sub>2</sub>@N-rGOx and (b) 15% Co-MoS<sub>2</sub>@N-rGOx

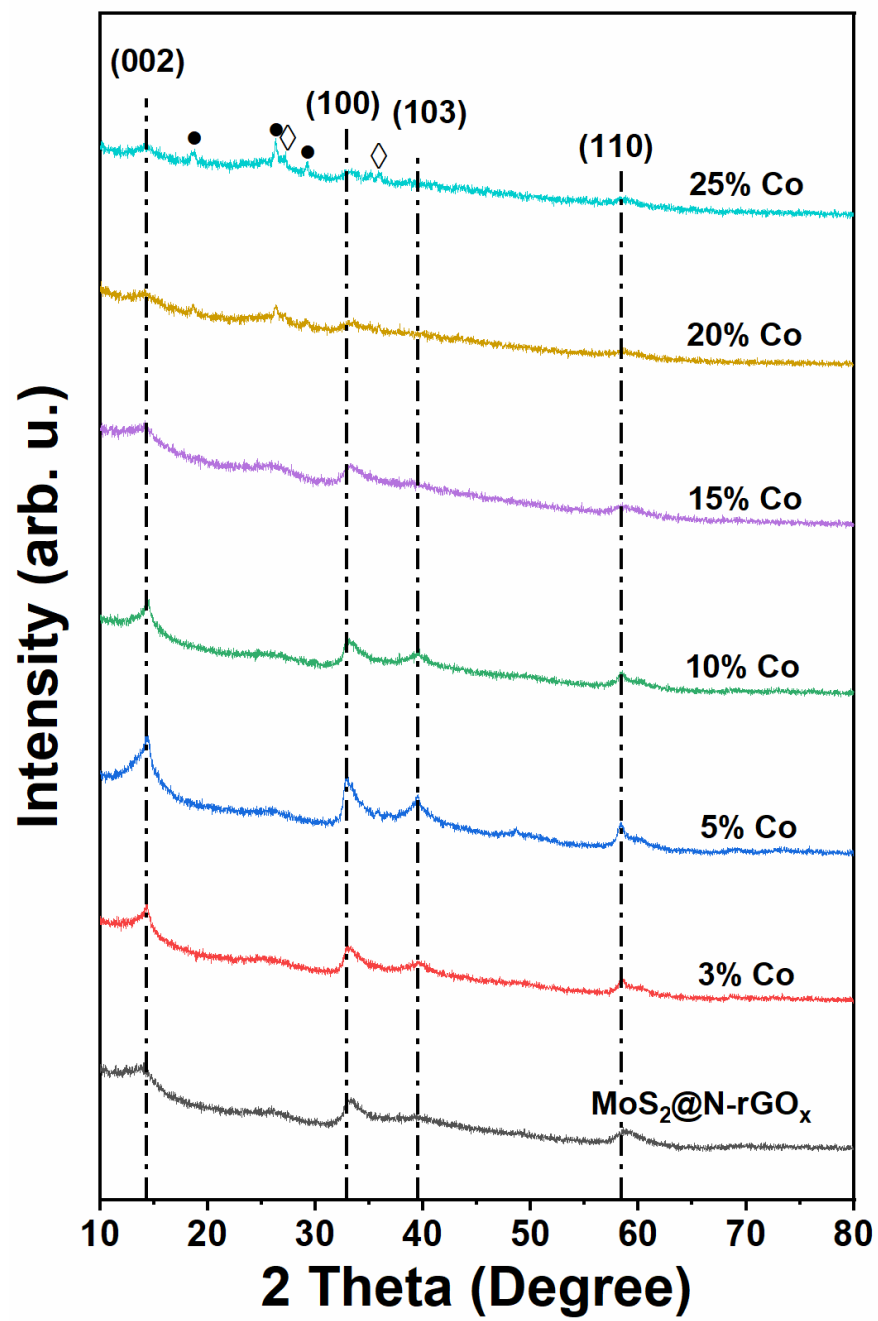

**Fig. S7.** XRD patterns of the synthesized samples after placing 3 months. Peaks marked by ● are associated with CoMoS<sub>2.17</sub>O<sub>1.12</sub> and peaks marked by ◇ can be assigned to CoMoS<sub>2.96</sub>O<sub>0.25</sub>

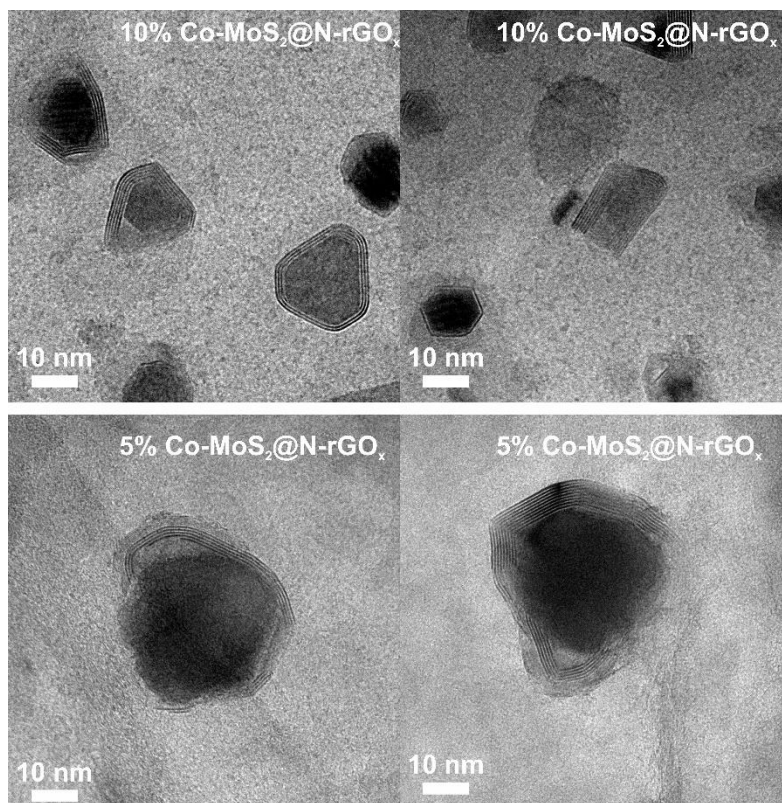

**Fig. S8.** Core-shell nanoparticles observed on 5% and 10%Co-MoS<sub>2</sub>@N-rGO<sub>x</sub>. The shell has an interlayer distance consistent with MoS<sub>2</sub>.



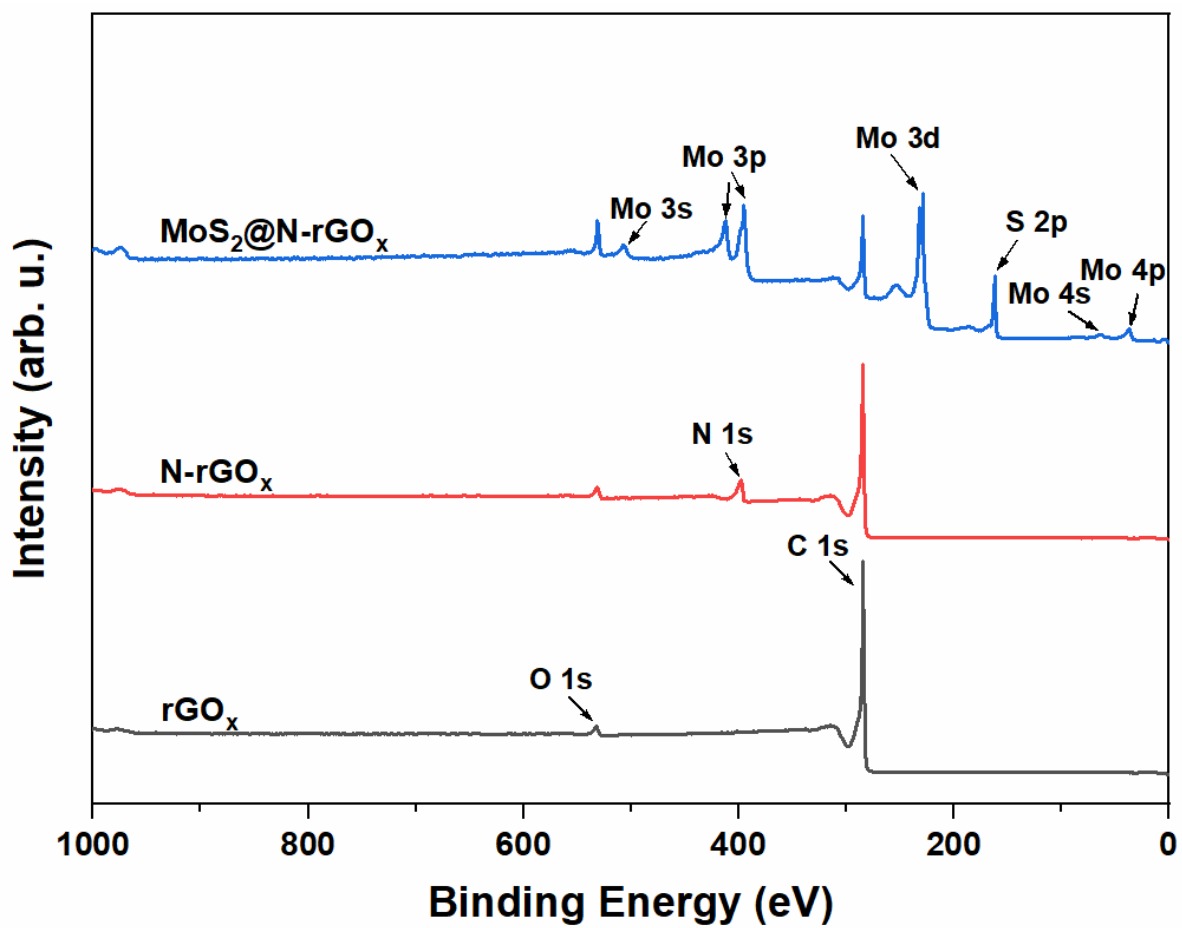

Fig. S9. Survey XPS spectra of pristine rGO<sub>x</sub>, N-rGO<sub>x</sub> and MoS<sub>2</sub>@N-rGO<sub>x</sub>. Note that in MoS<sub>2</sub>@N-rGO<sub>x</sub> the peak of Mo 3p overlaps with N 1s.

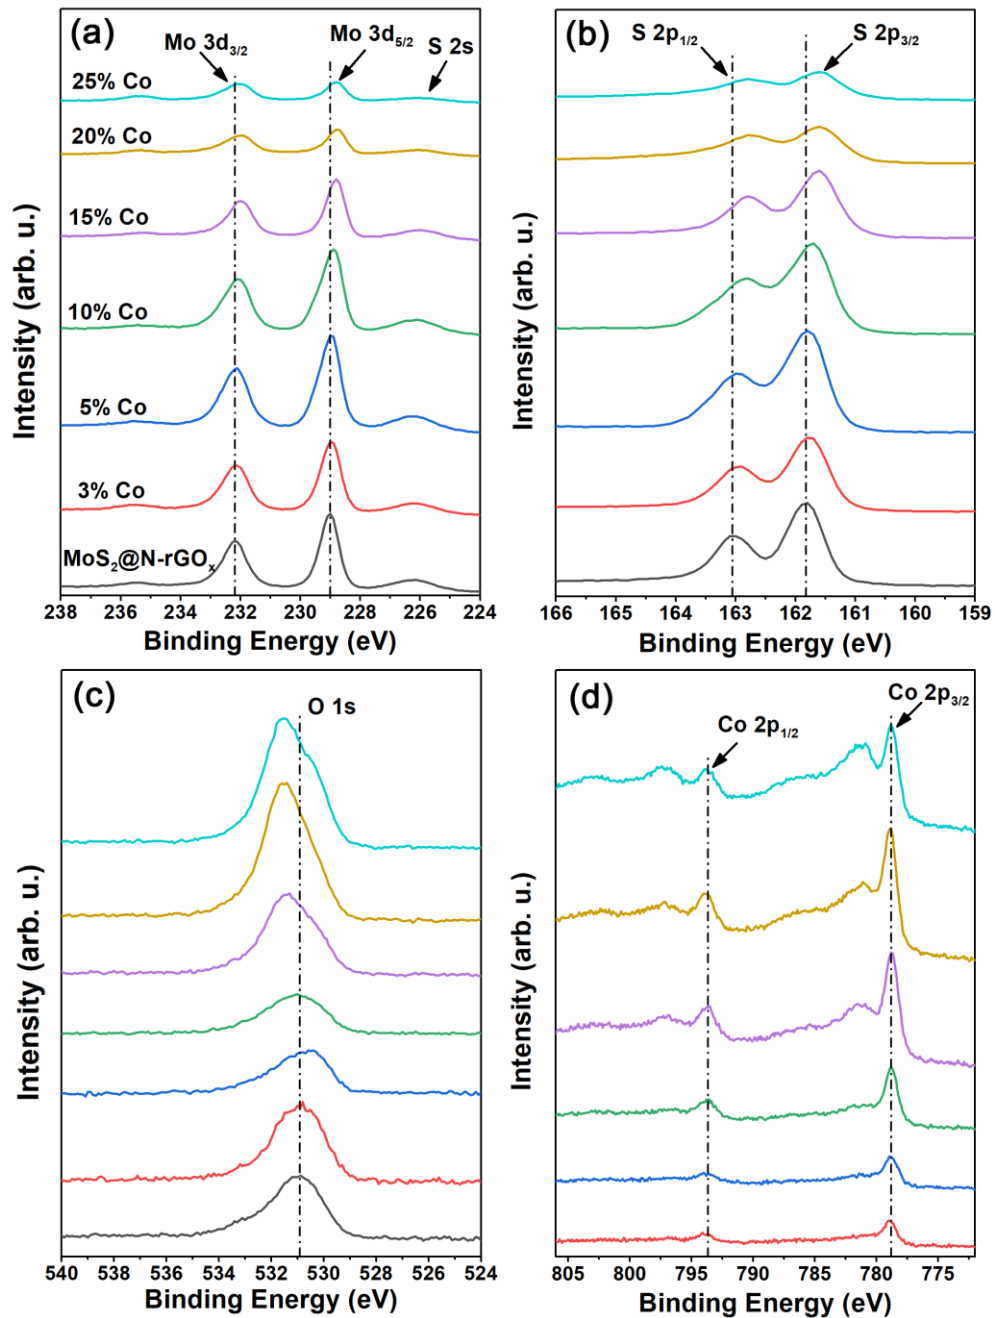

Fig. S10. XPS spectra evolution of (a) Mo 3d, (b) S 2p, (c) O 1s and (d) Co 2p peaks with Co doping.

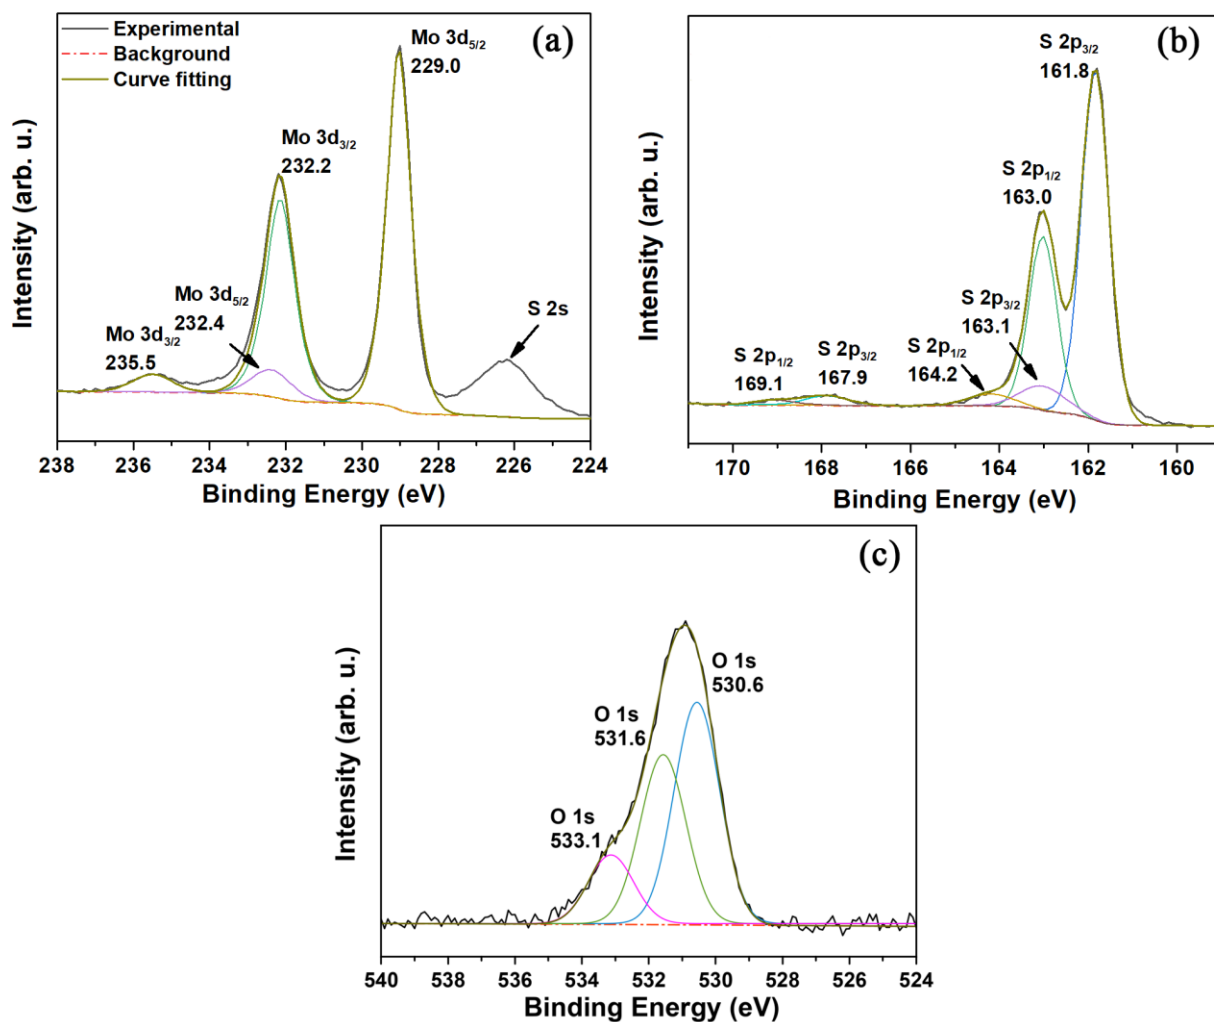

**Fig. S11.** XPS spectra deconvolution about (a) Mo 3d, (b) S 2p and (c) O 1s in the sample with MoS<sub>2</sub>@N-rGO<sub>x</sub>

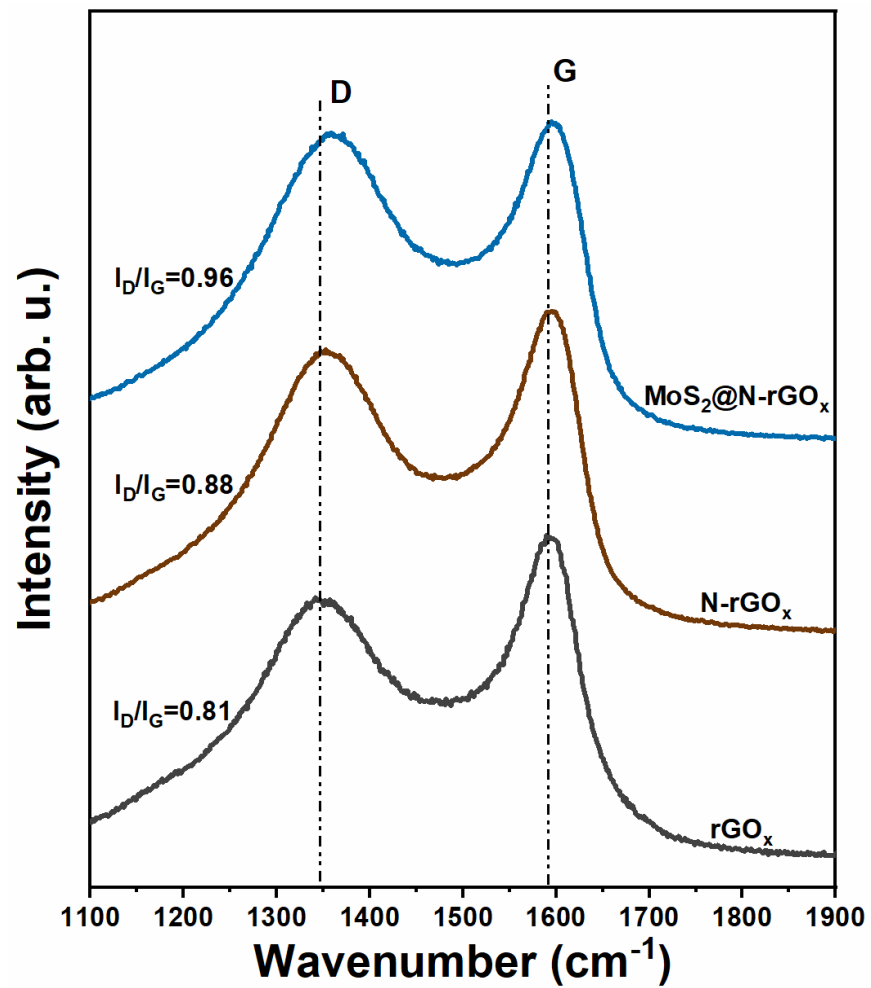

Fig. S12. Raman spectra of rGO<sub>x</sub>, N-rGO<sub>x</sub> and MoS<sub>2</sub>@N-rGO<sub>x</sub>.

**Table S1** Atomic ratio of each element in the synthesized samples

(a) Detected by EDS

|                                                       | <b>C</b> | <b>N</b> | <b>O</b> | <b>S</b> | <b>Mo</b> | <b>Co</b> | <b>Others</b> |
|-------------------------------------------------------|----------|----------|----------|----------|-----------|-----------|---------------|
| <b>N-rGO</b>                                          | 91.45    | 5.55     | 2.95     | -        | -         | -         |               |
| <b>MoS<sub>2</sub>@N-rGO<sub>x</sub></b>              | 65.375   | 6.225    | 8.49     | 11.895   | 8.025     | -         |               |
| <b>3% Co doped MoS<sub>2</sub>@N-rGO<sub>x</sub></b>  | 57.63    | 7.44     | 14.95    | 11.74    | 7.675     | 0,57      |               |
| <b>5% Co doped MoS<sub>2</sub>@N-rGO<sub>x</sub></b>  | 58.295   | 4.345    | 6.33     | 19,805   | 10.33     | 0.89      |               |
| <b>10% Co doped MoS<sub>2</sub>@N-rGO<sub>x</sub></b> | 66.11    | 4.845    | 9.63     | 12.245   | 5.825     | 1.34      |               |
| <b>15% Co Doped MoS<sub>2</sub>@N-rGO<sub>x</sub></b> | 64.035   | 5.615    | 10.735   | 11.865   | 5.315     | 2.33      | Si 0.105      |
| <b>20% Co doped MoS<sub>2</sub>@N-rGO<sub>x</sub></b> | 62,36    | 6.73     | 13.66    | 10.025   | 4.475     | 2.75      |               |
| <b>25% Co doped MoS<sub>2</sub>@N-rGO<sub>x</sub></b> | 64.82    | 7.34     | 14.265   | 7.305    | 3.21      | 3.06      |               |

(b) Detected by XPS

|                                                       | <b>C</b> | <b>N</b> | <b>O</b> | <b>S</b> | <b>Mo</b> | <b>Co</b> | <b>Others</b> |
|-------------------------------------------------------|----------|----------|----------|----------|-----------|-----------|---------------|
| <b>N-rGO</b>                                          | 89.79    | 7.79     | 2.41     | -        | -         | -         |               |
| <b>MoS<sub>2</sub>@N-rGO<sub>x</sub></b>              | 64.41    | -        | 8.09     | 17.6     | 9.9       | -         |               |
| <b>3% Co doped MoS<sub>2</sub>@N-rGO<sub>x</sub></b>  | 56.21    | -        | 11.42    | 19.31    | 12.36     | 0.73      |               |
| <b>5% Co doped MoS<sub>2</sub>@N-rGO<sub>x</sub></b>  | 52.55    | -        | 5.87     | 25.03    | 14.92     | 1.02      |               |
| <b>10% Co doped MoS<sub>2</sub>@N-rGO<sub>x</sub></b> | 51.61    | -        | 6.59     | 25.20    | 14.59     | 2.03      |               |
| <b>15% Co Doped MoS<sub>2</sub>@N-rGO<sub>x</sub></b> | 57.96    | -        | 11.44    | 17.15    | 9.35      | 4.11      |               |
| <b>20% Co doped MoS<sub>2</sub>@N-rGO<sub>x</sub></b> | 55.32    | 13.96    | 12.85    | 10.08    | 3.92      | 3.87      |               |
| <b>25% Co doped MoS<sub>2</sub>@N-rGO<sub>x</sub></b> | 59.06    | 10.96    | 13.35    | 8.42     | 3.63      | 4.64      |               |

**Table S2** Comparison of HER activity of microwave synthesized 15% Co doped MoS<sub>2</sub>@N-rGO with MoS<sub>2</sub> related catalysts described in published articles.

| Catalysts                                                                    | Synthesis method                                 | Overpotential $\eta$ at 10 mA·cm <sup>-2</sup> (mV) | Tafel slope (mV·dec <sup>-1</sup> ) | References |
|------------------------------------------------------------------------------|--------------------------------------------------|-----------------------------------------------------|-------------------------------------|------------|
| CoMoS                                                                        | Co-precipitation followed annealing              | 135                                                 | 50                                  | 1          |
| 2D MoS <sub>2</sub> monolayer                                                | CVD followed hydrogen plasma treatment           | 183                                                 | 77.6                                | 2          |
| CoS <sub>2</sub> nanowires                                                   | Solvothermal                                     | 145                                                 | 51.6                                | 3          |
| MoS <sub>2</sub> on hydrogenated graphene                                    | Solvothermal                                     | 124                                                 | 41                                  | 4          |
| 1T' MoS <sub>2</sub> on graphitic nanoribbons                                | Solvothermal                                     | 205                                                 | 50                                  | 5          |
| 1T MoS <sub>2</sub>                                                          | CVD followed <i>n</i> -Butyl lithium exfoliation | 187                                                 | 43                                  | 6          |
| Co <sub>9</sub> S <sub>8</sub> @MoS <sub>2</sub> on CNFs                     | Electrospinning followed CVD                     | 190                                                 | 110                                 | 7          |
| MoS <sub>2</sub> -rGO <sub>240</sub>                                         | Microwaved assisted solvothermal                 | 104                                                 | 63                                  | 8          |
| Ag <sub>2</sub> S/MoS <sub>2</sub> /rGO                                      | Solvothermal                                     | 190                                                 | 56                                  | 9          |
| 3D-Co-MoS <sub>2</sub> on graphene                                           | Hard template and solvothermal                   | 143                                                 | 71                                  | 10         |
| MoS <sub>2</sub> quantum dots                                                | Pulsed laser ablation                            | ~200                                                | 49                                  | 11         |
| Amorphous MoS <sub>x</sub>                                                   | Electrodeposition                                | 160                                                 | -                                   | 12         |
| MoS <sub>2</sub> on rGO                                                      | Modified hydrothermal                            | 140                                                 | 50                                  | 13         |
| Rose-like MoS <sub>2</sub> and exfoliated WS <sub>2</sub> on carbon nanotube | Solvothermal                                     | 212                                                 | 50                                  | 14         |
| Co doped MoS <sub>2</sub> on N-rGO <sub>x</sub> (as-synthesized)             | Microwave irradiation                            | 197                                                 | 61                                  | This work  |

## Reference

- 1 X. Dai, K. Du, Z. Li, M. Liu, Y. Ma, H. Sun, X. Zhang and Y. Yang, *ACS Appl. Mater. Interfaces*, 2015, **7**, 27242–27253.
- 2 C. C. Cheng, A. Y. Lu, C. C. Tseng, X. Yang, M. N. Hedhili, M. C. Chen, K. H. Wei and L. J. Li, *Nano Energy*, 2016, **30**, 846–852.
- 3 M. S. Faber, R. Dziejczak, M. A. Lukowski, N. S. Kaiser, Q. Ding and S. Jin, *J. Am. Chem. Soc.*, 2014, **136**, 10053–10061.
- 4 X. Han, X. Tong, X. Liu, A. Chen, X. Wen, N. Yang and X. Y. Guo, *ACS Catal.*, 2018, **8**, 1828–1836.
- 5 J. Ekspong, R. Sandström, L. P. Rajukumar, M. Terrones, T. Wågberg and E. Gracia-Espino, *Adv. Funct. Mater.*, 2018, **28**, 1802744.
- 6 M. A. Lukowski, A. S. Daniel, F. Meng, A. Forticaux, L. Li and S. Jin, *J. Am. Chem. Soc.*, 2013, **135**, 10274–10277.
- 7 H. Zhu, J. Zhang, R. Yanzhang, M. Du, Q. Wang, G. Gao, J. Wu, G. Wu, M. Zhang, B. Liu, J. Yao and X. Zhang, *Adv. Mater.*, 2015, **27**, 4752–4759.
- 8 M. Chatti, T. Gengenbach, R. King, L. Spiccia and A. N. Simonov, *Chem. Mater.*, 2017, **29**, 3092–3099.
- 9 G. Solomon, R. Mazzaro, S. You, M. M. Natile, V. Morandi, I. Concina and A. Vomiero, *ACS Appl. Mater. Interfaces*, 2019, **11**, 22380–22389.
- 10 X. Meng, L. Yu, C. Ma, B. Nan, R. Si, Y. Tu, J. Deng, D. Deng and X. Bao, *Nano Energy*, 2019, **61**, 611–616.
- 11 J. Tang, M. Sakamoto, H. Ohta and K. Saitow, *Nanoscale*, 2020, **12**, 4352–4358.
- 12 O. Mabayoje, Y. Liu, M. Wang, A. Shoola, A. M. Ebrahim, A. I. Frenkel and C. B. Mullins, *ACS Appl. Mater. Interfaces*, 2019, **11**, 32879–32886.
- 13 T. Aditya, A. K. Nayak, D. Pradhan, A. Pal and T. Pal, *Electrochim. Acta*, 2019, **313**, 341–351.
- 14 P. Thangasamy, S. Oh, S. Nam and I.-K. Oh, *Carbon*, 2020, **158**, 216–225.
